# Supplementary material for: Neoadjuvant chemotherapy affects molecular classification of colorectal tumors
Source: PubMed Central journal article supplement (PMC5541704; doi:10.1038/oncsis.2017.48), 2017-07-10
Supplement: oncsis201748x1.pdf [file oncsis201748x1.pdf]

Supplemental Table 1

| Primary tumor - Liver metastatis        | Concordant<br>n=71 | epithelial - mesenchymal<br>n=25 | mesenchymal - epithelial<br>n=33 | p-value |
|-----------------------------------------|--------------------|----------------------------------|----------------------------------|---------|
| <b>Chemotherapy before liversurgery</b> |                    |                                  |                                  |         |
| yes                                     | 11                 | 10                               | 8                                | 0,04    |
| no                                      | 60                 | 15                               | 25                               |         |
| <b>Neoadjuvant chemotherapy</b>         |                    |                                  |                                  |         |
| yes                                     | 5                  | 1                                | 7                                | 0,044   |
| no                                      | 66                 | 24                               | 26                               |         |
| <b>Neoadjuvant Radiotherapy</b>         |                    |                                  |                                  |         |
| yes                                     | 21                 | 2                                | 9                                | 0,093   |
| no                                      | 50                 | 23                               | 24                               |         |
| <b>Adjuvant chemotherapy</b>            |                    |                                  |                                  |         |
| yes                                     | 9                  | 3                                | 7                                | 0,475   |
| no                                      | 62                 | 22                               | 26                               |         |
